# Supplementary material
Source: PubMed Central journal article supplement (PMC8995376)
Supplement: NIHMS1768066-supplement-supinfo.pdf [file NIHMS1768066-supplement-supinfo.pdf]

## SUPPLEMENTARY MATERIAL

- Figure S1.** Characterization of the pediatric SB cohorts recruited from BCH vs non-BCH cohorts.
- Table S1.** Clinical characteristics of the 50 affected individuals from 50 families with SB.
- Table S2.** 43 potential candidate genes known to cause SB in mouse models.
- Table S3.** 27 potential candidate genes known to potentially cause human isolated SB.
- Table S4.** 66 potential candidate genes known to cause human clinical syndromes with facultative SB features.
- Table S5.** Decision making strategy to determine causality of identified variants.
- Table S6.** Information on SB cases with variants identified in multiple of the candidate genes per family from lists A, B, or C or unbiased exome-wide evaluation.
- Table S7.** Variants that were excluded after reverse phenotyping, segregation analysis, or were present in in-house negative control analysis.
- Table S8.** Variant information for SB cohort and internal control cohort.

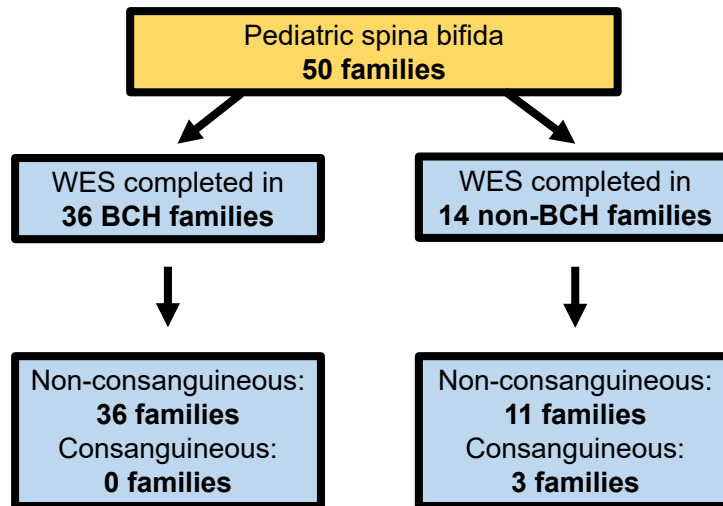

**Figure S1. Characterization of the pediatric SB cohorts recruited from BCH vs non-BCH cohorts.**

We enrolled 50 individuals with SB from 50 families for whole exome sequencing (WES). 36 out of 50 families were seen from Boston Children’s Hospital (BCH) from July 2019 to March 2020. All individuals from Boston Children’s Hospital were from non-consanguineous families. Among 14 of 50 families who were recruited from non-BCH hospitals, 3 individuals were from consanguineous families.

**Table S1. Clinical characteristics of the 50 affected individuals from 50 families with SB.**

|                                            | <b>Total Cohort</b> |             |
|--------------------------------------------|---------------------|-------------|
|                                            | <b>n</b>            | <b>%</b>    |
| <b><u>Family structure</u></b>             | <b>50</b>           | <b>100%</b> |
| Singleton <sup>a</sup>                     | 17                  | 34%         |
| Duo <sup>b</sup> or Multi-Duo <sup>c</sup> | 29                  | 58%         |
| Trio <sup>d</sup>                          | 4                   | 8%          |
| <b><u>Gender</u></b>                       | <b>50</b>           | <b>100%</b> |
| Female                                     | 27                  | 54%         |
| Male                                       | 23                  | 46%         |
| <b><u>Ethnicity</u></b>                    | <b>50</b>           | <b>100%</b> |
| Caucasian                                  | 31                  | 62%         |
| Hispanic                                   | 6                   | 12%         |
| Arabic                                     | 7                   | 14%         |
| African American                           | 2                   | 4%          |
| Asian                                      | 1                   | 2%          |
| Cap Verdean                                | 1                   | 2%          |
| Indian subcontinent                        | 1                   | 2%          |
| Macedonian                                 | 1                   | 2%          |
| <b><u>Family history</u></b>               | <b>50</b>           | <b>100%</b> |
| No family history                          | 50                  | 100%        |
| <b><u>Reported consanguinity</u></b>       | <b>50</b>           | <b>100%</b> |
| Yes                                        | 3                   | 6%          |
| No                                         | 47                  | 94%         |
| <b><u>Clinical manifestation</u></b>       | <b>50</b>           | <b>100%</b> |
| Syndromic spina bifida                     | 20                  | 40%         |
| Isolated spina bifida                      | 30                  | 60%         |
| <b><u>SB subtype</u></b>                   | <b>50</b>           | <b>100%</b> |
| Spina bifida occulta                       | 1                   | 2%          |
| Tethered cord                              | 3                   | 6%          |

|                                                |                  |             |
|------------------------------------------------|------------------|-------------|
| Meningocele                                    | 1                | 2%          |
| Lipomeningocele                                | 1                | 2%          |
| Myelomeningocele                               | 33               | 66%         |
| Myelomeningocele and tethered cord             | 3                | 6%          |
| Lipomyelomeningocele                           | 1                | 2%          |
| Lipomyelomeningocele and Tethered cord         | 4                | 8%          |
| Diastematomyelia                               | 1                | 2%          |
| Specific subtype unknown                       | 2                | 4%          |
| <b><u>Complications associated with SB</u></b> | <b><u>50</u></b> | <b>100%</b> |
| Neurogenic bladder                             | 39               | 78%         |
| Neurogenic bowel                               | 29               | 58%         |
| Chiari malformation, type II                   | 33               | 66%         |
| Hydrocephalus                                  | 29               | 58%         |

**SB**, spina bifida; **WES**, whole exome sequencing.

<sup>a</sup>**Singlet**: only the affected individual's DNA was available for WES analysis.

<sup>b,c</sup>**Duo/Multi-Duo**: the affected individual and one parent's DNAs were available for WES analysis.

<sup>d</sup>**Trio**: both the affected individual's and the parents' DNA were obtained for WES analysis.

**Table S2. 43 potential candidate genes known to cause SB in mouse models.**

Genes are listed alphabetically by gene symbol.

| Mouse ortholog    | Human gene     | Encoded protein                                | MOI in mouse model <sup>a</sup> | Reference                                               | Zygoty of variant identified in our cohort | PLI <sup>b</sup> | O/E   | Missense Z score | OMIM gene number | SB reported in OMIM | Genetic Study in human SB                                                                                                                                                                                          | Reference                         |
|-------------------|----------------|------------------------------------------------|---------------------------------|---------------------------------------------------------|--------------------------------------------|------------------|-------|------------------|------------------|---------------------|--------------------------------------------------------------------------------------------------------------------------------------------------------------------------------------------------------------------|-----------------------------------|
| <b>aln/Ttc21b</b> | <b>TTC21B</b>  | Tetratricopeptide Repeat Domain 21B            | AR                              | Herron <i>Nat Genet</i> 30:185, 2002                    | /                                          | 0                | 0.649 | -0.286           | 613819 AR        | NR                  | NA                                                                                                                                                                                                                 | /                                 |
| <b>Ambra1</b>     | <b>AMBRA1</b>  | Autophagy And Beclin 1 Regulator 1             | AR                              | Fimia <i>Nature</i> 447:1121, 2007                      | Hom                                        | 1                | 0.056 | 3.082            | /                | NR                  | Case control study, 352 NTDs vs 224 matched control. Five rare heterozygous missense mutations of <i>AMBRA1</i> were identified, which is absent in control cohort. Functional study was done in a zebrafish model | <i>Ye Hum Mutat</i> 41:1383, 2020 |
| <b>Apaf1</b>      | <b>APAF1</b>   | Apoptotic Peptidase Activating Factor 1        | AR                              | Honarpour <i>Proc Natl Acad Sci U S A</i> 98:9683, 2001 | /                                          | 0                | 0.329 | 1.606            | /                | NR                  | /                                                                                                                                                                                                                  | /                                 |
| <b>Axin1</b>      | <b>AXIN1</b>   | Axis Inhibition Protein 1                      | AD/AR                           | Reed <i>Genetics</i> 22:1, 2003                         | het                                        | 0.728            | 0.2   | 1.168            | 607864           | NR                  | /                                                                                                                                                                                                                  | /                                 |
| <b>Brca1</b>      | <b>BRCA1</b>   | BRCA1 DNA Repair Associated                    | AR                              | Gowen <i>Nat Genet</i> 12:191, 1996                     | /                                          | 0                | 0.723 | 0.852            | 617883 AR        | NR                  | /                                                                                                                                                                                                                  | /                                 |
| <b>Cyp26a1</b>    | <b>CYP26A1</b> | Cytochrome P450 Family 26 Subfamily A Member 1 | AR                              | Abu-Abed <i>Genes Dev</i> 15:226, 2001                  | /                                          | 0                | 0.831 | 0.397            | /                | /                   | /                                                                                                                                                                                                                  | /                                 |
| <b>Dvl2</b>       | <b>DVL2</b>    | Dishevelled Segment Polarity Protein 2         | AR                              | Hamblet <i>Development</i> 129:5827, 2002               | /                                          | 0                | 0.425 | 0.388            | /                | /                   | /                                                                                                                                                                                                                  | /                                 |
| <b>Fgfr1</b>      | <b>FGFR1</b>   | Fibroblast Growth Factor Receptor 1            | AR                              | Xu <i>Dev Biol</i> 208:293, 1999                        | /                                          | 1                | 0.099 | 2.406            | 136350 AD        | NR                  | /                                                                                                                                                                                                                  | /                                 |
| <b>Fkbp8</b>      | <b>FKBP8</b>   | FKBP Prolyl Isomerase 8                        | AR                              | Nakagawa <i>Genes Cells</i> 12:709, 2007                | /                                          | 0.998            | 0     | 2.363            | /                | /                   | /                                                                                                                                                                                                                  | /                                 |
| <b>Foxc1</b>      | <b>FOXC1</b>   | Forkhead Box C1                                | AR                              | Kume <i>Cell</i> 93: 985, 1998                          | /                                          | 0.955            | 0     | 0.665            | 602482 AD        | NR                  | /                                                                                                                                                                                                                  | /                                 |

| Mouse ortholog      | Human gene     | Encoded protein                                  | MOI in mouse model <sup>a</sup> | Reference                                             | Zygoty of variant identified in our cohort | PLI <sup>b</sup> | O/E   | Missense Z score | OMIM gene number | SB reported in OMIM | Genetic Study in human SB                                                                                                                                                                                                                                                     | Reference                                                                      |
|---------------------|----------------|--------------------------------------------------|---------------------------------|-------------------------------------------------------|--------------------------------------------|------------------|-------|------------------|------------------|---------------------|-------------------------------------------------------------------------------------------------------------------------------------------------------------------------------------------------------------------------------------------------------------------------------|--------------------------------------------------------------------------------|
| <b>Foxc2</b>        | <b>FOXC2</b>   | Forkhead Box C2                                  | AR                              | Lida <i>Development</i> 124:4627, 1997                | het                                        | 0.136            | 0.306 | -0.133           | 153400 AD        | Yes                 | /                                                                                                                                                                                                                                                                             | /                                                                              |
| <b>Fpn1/Slc40a1</b> | <b>SLC40A1</b> | Solute Carrier Family 40 Member 1                | AR                              | Zohn <i>Blood</i> 109:4171, 2007                      | /                                          | 0.99             | 0.111 | 2.083            | 606069 AD        | NR                  | /                                                                                                                                                                                                                                                                             | /                                                                              |
| <b>Gpr161</b>       | <b>GPR161</b>  | G Protein-Coupled Receptor 161                   | AR                              | Mukhopadhyay <i>Cell</i> 152:210, 2013                | /                                          | 0                | 0.45  | 1.489            | /                | /                   | Case control study, 384 SB individuals vs 190 healthy controls, six rare variants of <i>GPR161</i> in six SB cases.<br>The novel <i>GPR161</i> rare variants mislocalized to the primary cilia, dysregulated Shh and Wnt signaling and inhibited cell proliferation in vitro. | Kim <i>Hum Mol Genet</i> 28:200, 2019                                          |
| <b>Grhl3/ct</b>     | <b>GRHL3</b>   | Grainyhead Like Transcription Factor 3           | AD/AR                           | Ting <i>Nat Med</i> 9:1513, 2003                      | /                                          | 0.993            | 0.108 | 1.458            | 606713 AD        | NR                  | Trio analysis:<br>One de novo missense variant from 43 cases. (WES)<br>Two truncating (one is homozygous) and 5 missense variants from 233 cases. (WES and MIPS)                                                                                                              | Lemay <i>J med Genet</i> 52:493, 2015<br>Lemay <i>Hum Mutat</i> 38:716, 2017   |
| <b>Itgb1</b>        | <b>ITGB1</b>   | Integrin Subunit Beta 1                          | AR                              | Baudoin <i>Genes Dev</i> 12:1202, 1998                | /                                          | 0.999            | 0.103 | 3.603            | /                | /                   | WES analysis<br>1 Frameshift variant was identified in 1 out of 51 NTD                                                                                                                                                                                                        | Lemay <i>Mol Genet Genomic Med</i> 7:e00467                                    |
| <b>Itpk1</b>        | <b>ITPK1</b>   | Inositol-Tetrakisphosphate 1-Kinase              | AD/AR                           | Wilson <i>Proc Natl Acad Sci U S A</i> 106:9831, 2009 | /                                          | 0.994            | 0.051 | 1.302            | /                | /                   | /                                                                                                                                                                                                                                                                             | /                                                                              |
| <b>Lrp6</b>         | <b>LRP6</b>    | LDL Receptor Related Protein 6                   | AR                              | Kokubu <i>Development</i> 131:5469, 2004              | /                                          | 0.984            | 0.195 | 3.03             | 610947 AD        | NR                  | Case control studies<br>Three deleterious missense variants were identified in 192 spina bifida patients (190 controls)<br>Three rare missense variants were found in 343 NTD patients (215 controls)                                                                         | Lei <i>Hum Mutat</i> 36:342, 2015<br>Shi <i>Birth Defects Res</i> 110:63, 2018 |
| <b>Map3k4</b>       | <b>MAP3K4</b>  | Mitogen-Activated Protein Kinase Kinase Kinase 4 | AR                              | Abell <i>Mol Cell Biol</i> 25:8948, 2005              | /                                          | 1                | 0.108 | 3.085            | /                | /                   | /                                                                                                                                                                                                                                                                             | /                                                                              |

| Mouse ortholog       | Human gene             | Encoded protein                                              | MOI in mouse model <sup>a</sup> | Reference                                        | Zygoty of variant identified in our cohort | PLI <sup>b</sup> | O/E    | Missense Z score | OMIM gene number | SB reported in OMIM | Genetic Study in human SB                                                                                                                                                                                                                                                                                                                                                                      | Reference                                                                                                                                                               |
|----------------------|------------------------|--------------------------------------------------------------|---------------------------------|--------------------------------------------------|--------------------------------------------|------------------|--------|------------------|------------------|---------------------|------------------------------------------------------------------------------------------------------------------------------------------------------------------------------------------------------------------------------------------------------------------------------------------------------------------------------------------------------------------------------------------------|-------------------------------------------------------------------------------------------------------------------------------------------------------------------------|
| <i>Marcks1/ Mlp</i>  | <b>MARCKSL1</b>        | Myristoylated Alanine Rich Protein Kinase C Substrate Like 1 | AR                              | Wu <i>Proc Natl Acad Sci U S A</i> 93:2110, 1996 | /                                          | 0.015            | -0.227 | 0.683            | /                | /                   | /                                                                                                                                                                                                                                                                                                                                                                                              | /                                                                                                                                                                       |
| <b>Med12</b>         | <b>MED12</b>           | Mediator Complex Subunit 12                                  | XL                              | Rocha <i>Development</i> 137:2723, 2010          | /                                          | 1                | 0.012  | 6.581            | 300188 XLR       | NR                  | /                                                                                                                                                                                                                                                                                                                                                                                              | /                                                                                                                                                                       |
| <b>Ndst1</b>         | <b>NDST1</b>           | N-Deacetylase And N-Sulfotransferase 1                       | AR                              | Pallerla <i>Dev Dyn</i> 236:556, 2007            | /                                          | 1                | 0.074  | 2.971            | 616116 AR        | NR                  | /                                                                                                                                                                                                                                                                                                                                                                                              | /                                                                                                                                                                       |
| <b>Nog</b>           | <b>NOG</b>             | Noggin                                                       | AR                              | McMahon <i>Genes Dev</i> 12:1438, 1998           | /                                          | 0.892            | 0      | 1.35             | 602991 AD        | NR                  | /                                                                                                                                                                                                                                                                                                                                                                                              | /                                                                                                                                                                       |
| <i>p38IP/Su pt20</i> | <b>SUPT20H/F AM48A</b> | SPT20 Homolog                                                | AR                              | Zohn <i>Cell</i> 125:957, 2006                   | /                                          | 0                | 0.576  | 1.285            | /                | /                   | /                                                                                                                                                                                                                                                                                                                                                                                              | /                                                                                                                                                                       |
| <b>Pax3</b>          | <b>PAX3</b>            | Paired Box 3                                                 | AD/AR                           | Xiao <i>J Genet Genomics</i> 38:333, 2011        | /                                          | 0.232            | 0.243  | 1.805            | 193500 AD        | Yes                 | 5bp deletion identified in a patient with Waardenburg syndrome and spina bifida.<br><i>De novo</i> heterozygous deletion including <i>PAX3</i> was identified in a spina bifida patient.<br>One <i>de novo</i> stopgain variant from 43 cases. (WES)<br>( <i>De novo</i> missense variant in <i>PAX3</i> was found in a patient with Waardenburg syndrome and myelomeningocele. (targeted NGS) | Hol <i>J Med Genet</i> 32:52, 1995<br>Bassuk <i>Hum Mol Genet</i> 22:1097, 2013<br>Lemay <i>J Med Genet</i> 52:493, 2015<br>Hart <i>Am J Med Genet A</i> 173:2472, 2017 |
| <b>Pdgfc</b>         | <b>PDGFC</b>           | Platelet Derived Growth Factor C                             | AR                              | Ding <i>Nat Genet</i> 36:1111, 2004              | /                                          | 0.994            | 0      | 1.286            | /                | /                   | /                                                                                                                                                                                                                                                                                                                                                                                              | /                                                                                                                                                                       |
| <b>Pdgfra</b>        | <b>PDGFRA</b>          | Platelet Derived Growth Factor Receptor Alpha                | AR                              | Soriano <i>Development</i> 124:2691, 1997        | /                                          | 1                | 0.073  | 2.079            | 175510 AD        | NR                  | Panel sequencing<br>1 frameshift was identified in an anencephaly case.<br>Specific (90 cases, 509 control)                                                                                                                                                                                                                                                                                    | Ishida <i>Clin Genet</i> 93:870, 2018                                                                                                                                   |
| <b>Pkd1</b>          | <b>PKD1</b>            | Polycystin 1                                                 | AR                              | Lu <i>Nat Genet</i> 17:179, 1997                 | /                                          | 1                | 0.117  | -3.719           | 601313 AD        | /                   | /                                                                                                                                                                                                                                                                                                                                                                                              | /                                                                                                                                                                       |
| <b>Prrx1</b>         | <b>PRRX1</b>           | Paired Related Homeobox 1                                    | AD/AR                           | Martin <i>Genes Dev</i> 9:1237, 1995             | /                                          | 0.273            | 0.248  | 1.019            | 202650 AD,AR     | /                   | /                                                                                                                                                                                                                                                                                                                                                                                              | /                                                                                                                                                                       |

| Mouse ortholog  | Human gene     | Encoded protein                                  | MOI in mouse model <sup>a</sup> | Reference                                             | Zygoty of variant identified in our cohort | PLI <sup>b</sup> | O/E   | Missense Z score | OMIM gene number | SB reported in OMIM | Genetic Study in human SB                                                                                                                                           | Reference                                                                          |
|-----------------|----------------|--------------------------------------------------|---------------------------------|-------------------------------------------------------|--------------------------------------------|------------------|-------|------------------|------------------|---------------------|---------------------------------------------------------------------------------------------------------------------------------------------------------------------|------------------------------------------------------------------------------------|
| <b>Ptpn9</b>    | <b>PTPN9</b>   | Protein Tyrosine Phosphatase Non-Receptor Type 9 | AR                              | Wang <i>J Exp Med</i> 202:1587,2005                   | /                                          | 0.115            | 0.256 | 2.165            | /                | /                   | /                                                                                                                                                                   | /                                                                                  |
| <b>Rab23</b>    | <b>RAB23</b>   | RAB23, Member RAS Oncogene Family                | AR                              | Gunther <i>Development</i> 120:3119, 1994             | /                                          | 0.006            | 0.422 | 0.339            | 201000 AR        | Yes                 | /                                                                                                                                                                   | /                                                                                  |
| <b>Rac1</b>     | <b>RAC1</b>    | Rac Family Small GTPase 1                        | AR                              | Migeotte <i>Development</i> 138:3011, 2011            | /                                          | 0.707            | 0.158 | 3.172            | 617751 AD        | /                   | /                                                                                                                                                                   | /                                                                                  |
| <b>Shroom3</b>  | <b>SHROOM3</b> | Shroom Family Member 3                           | AR                              | Hildebrand <i>Cell</i> 99:485, 1999                   | /                                          | 0.312            | 0.229 | 1.501            | /                | /                   | Trio WES analysis<br>Two de novo variants from 43 cases.                                                                                                            | Lemay <i>J Med Genet</i> 52:493, 2015                                              |
| <b>Sp8</b>      | <b>SP8</b>     | Sp8 Transcription Factor                         | AR                              | Bell <i>Proc Natl Acad Sci U S A</i> 100:12195, 2003  | /                                          | 0.966            | 0     | 1.933            | /                | /                   | /                                                                                                                                                                   | /                                                                                  |
| <b>Spint2</b>   | <b>SPINT2</b>  | Serine Peptidase Inhibitor, Kunitz Type 2        | AR                              | Szabo <i>Development</i> 136:2653, 2009               | /                                          | 0.001            | 0.523 | 1.097            | 270420 AR        | NR                  | /                                                                                                                                                                   | /                                                                                  |
| <b>T (Tbxt)</b> | <b>TBXT</b>    | T-Box Transcription Factor T                     | AD/AR                           | Park <i>Teratology</i> 39:303, 1989                   | het                                        | 0.002            | 0.326 | 1.074            | 192940 AD        | Yes                 | Case study and panel sequencing<br>Multiple patients from one large family. (linkage and WES)<br>Rare frameshift variant was identified in 1 out of 52 NTD patients | Shaheen <i>Hum Genet</i> 134:1139, 2015<br>Beaumont <i>Hum Genet</i> 138:363, 2019 |
| <b>Tgfb2</b>    | <b>TGFB2</b>   | Transforming Growth Factor Beta 2                | AR                              | Sanford <i>Development</i> 124:2659, 1997             | /                                          | 0.999            | 0     | 2.251            | 614816 AD        | NR                  | /                                                                                                                                                                   | /                                                                                  |
| <b>Traf4</b>    | <b>TRAF4</b>   | TNF Receptor Associated Factor 4                 | AR                              | Regnier <i>Proc Natl Acad Sci U S A</i> 99:5585, 2002 | /                                          | 0.937            | 2.415 | 0.137            | /                | /                   | /                                                                                                                                                                   | /                                                                                  |



| Mouse ortholog    | Human gene   | Encoded protein                                                  | MOI in mouse model <sup>a</sup> | Reference                                 | Zygoty of variant identified in our cohort | PLI <sup>b</sup> | O/E   | Missense Z score | OMIM gene number | SB reported in OMIM  | Genetic Study in human SB                                                                            | Reference                                       |
|-------------------|--------------|------------------------------------------------------------------|---------------------------------|-------------------------------------------|--------------------------------------------|------------------|-------|------------------|------------------|----------------------|------------------------------------------------------------------------------------------------------|-------------------------------------------------|
| Trpm6             | <b>TRPM6</b> | Transient Receptor Potential Cation Channel Subfamily M Member 6 | AR                              | Walder <i>Hum Mol Genet</i> 18:4367, 2009 | /                                          | 0                | 0.335 | 1.852            | 602014 AR        | NR                   | /                                                                                                    | /                                               |
| Tulp3             | <b>TULP3</b> | TUB Like Protein 3                                               | AD/AR                           | Ikeda <i>Hum Mol Genet</i> 10:1325, 2001  | het                                        | 0                | 0.558 | 0.3              | /                | /                    | /                                                                                                    | /                                               |
| Wnt3a             | <b>WNT3A</b> | Wnt Family Member 3A                                             | AD/AR                           | Greco <i>Genes Dev</i> 10:313, 1996       | /                                          | 0.965            | 0.068 | 2.117            | /                | /                    | /                                                                                                    | /                                               |
| <i>Zfx1a/Zeb1</i> | <b>ZEB1</b>  | Zinc Finger E-Box Binding Homeobox 1                             | AR                              | Takagi <i>Development</i> 125:21, 1998    | /                                          | 0.97             | 0.168 | 1.845            | 189909           | NR                   | /                                                                                                    | /                                               |
| <i>Zic1</i>       | <b>ZIC1</b>  | Zic Family Member 1                                              | AD/AR                           | Aruga <i>Mech Dev</i> 89:141, 1999        | /                                          | 0.942            | 0.075 | 2.682            | 600470 AD        | Yes                  | /                                                                                                    | /                                               |
| <i>Zic2</i>       | <b>ZIC2</b>  | Zic Family Member 2                                              | AD/AR                           | Elms <i>Dev Biol</i> 264:391, 2003        | /                                          | 0.977            | 0     | 3.545            | 609637 AD        | No, but NTD reported | Targeted sequencing, one frameshift variant was identified in one patient (117 NTDs vs 384 controls) | Klootwijk <i>Am J Med Genet A</i> 124A:40, 2004 |

**AD**, autosomal dominant; **AR**, autosomal recessive; **Hom**, homozygous; **het**, heterozygous; **MOI**, mode of inheritance; **O/E**, observed/expected ratio; **OMIM**, Online Mendelian Inheritance in Men (<http://www.omim.org>); **NTD**, neural tube defect; **NR**, not reported, **SB**, spina bifida.

<sup>a</sup>**AD**, both heterozygous and homozygous mice had an SB phenotype; **AR**, only homozygous mice had an SB phenotype.

<sup>b</sup>**PLI**, probability of LoF intolerance score.

**Table S3. 27 potential candidate genes known to potentially cause human isolated SB.**  
 Genes are listed by mode of inheritance and alphabetically by gene symbol.

| Human gene    | Encoded protein                               | OMIM gene number | MOI OMIM or literature | PLI <sup>b</sup> | O/E   | Missense Z_score | Genetic Study in human SB                                                                                                                         | Reference                                                         | Mouse model has SB |
|---------------|-----------------------------------------------|------------------|------------------------|------------------|-------|------------------|---------------------------------------------------------------------------------------------------------------------------------------------------|-------------------------------------------------------------------|--------------------|
| <b>AMT</b>    | Aminomethyl transferase                       | No               | AD <sup>a</sup>        | 0.003            | 0.426 | -0.088           | Case-control study (panel sequencing)<br>Two unique nonsynonymous changes were identified in the <i>AMT</i> gene (258 NTD cases vs 562 controls). | Ayumi Narisawa <i>Hum Mol Genet</i> 21:1496, 2012                 | Yes                |
| <b>ANKRD6</b> | Ankyrin Repeat Domain 6                       | No               | AD <sup>a</sup>        | 0                | 0.589 | 0.929            | Case-control study<br>Found 4 rare missense mutations in <i>ANKRD6</i> from 473 NTD patients (150 controls) (Sanger sequencing).                  | Allache <i>Birth Defects Res A Clin Mol Teratol</i> 103:20, 2015  | NR                 |
| <b>CBS</b>    | Cystathionine Beta-Synthase                   | No               | AD <sup>a</sup>        | 0                | 0.455 | 0.933            | Case study<br>Found two potential novel disease-causing variants (sanger sequencing).                                                             | Tilley <i>Birth Defects Res A Clin Mol Teratol</i> 94:52, 2012    | NR                 |
| <b>CELSR1</b> | Cadherin EGF LAG Seven-Pass G-Type Receptor 1 | No               | AD <sup>a</sup>        | 1                | 0.159 | 1.386            | Case control study<br>Deleterious <i>CELSR1</i> mutations were found in 12 out of 412 NTD patients.                                               | Allache <i>Birth Defects Res A Clin Mol Teratol</i> 94, 176, 2012 | NR                 |
| <b>CELSR2</b> | Cadherin EGF LAG Seven-Pass G-Type Receptor 2 | No               | AD <sup>a</sup>        | 1                | 0.175 | 1.962            | Panel sequencing (30 genes in Wnt/PCP pathways).<br>Several likely deleterious variants were found in <i>CELSR1-3</i> genes.                      | Chen <i>BMC Med Genomics</i> 11:38, 2018                          | NR                 |
| <b>CELSR3</b> | Cadherin EGF LAG Seven-Pass G-Type Receptor 3 | No               | AD <sup>a</sup>        | 1                | 0.174 | 4.334            | Panel sequencing (30 genes in Wnt/PCP pathways)<br>Several likely deleterious variants were found in <i>CELSR1-3</i> genes.                       | Chen <i>BMC Med Genomics</i> 11:38, 2018                          | NR                 |
| <b>DISP1</b>  | Dispatched RND Transporter Family Member 1    | No               | AD <sup>a</sup>        | 0                | 0.408 | 1.188            | Targeted exome sequencing (5,504 genes)<br>Rare missense variant was identified in one out of 52 NTD patients.                                    | Beaumont <i>Hum Genet.</i> 138:363. 2019                          | Yes                |
| <b>DLC1</b>   | DLC1 Rho GTPase Activating Protein            | No               | AD <sup>a</sup>        | 1                | 0.138 | -2.195           | Case control study<br>Nonsense variants were identified in 2 out of 51 NTD families (WES).                                                        | Lemay <i>Mol Genet Genomic Med</i> 7:e00467, 2019                 | NR                 |
| <b>DVL1</b>   | Dishevelled Segment Polarity Protein 1        | No               | AD <sup>a</sup>        | 0                | 0.439 | -0.974           | Case control study (DVL gene sequencing)<br>Two rare variants were identified in 176 NTD individuals (176 NTD individuals vs 480 controls).       | Liu J <i>Genet Genomics</i> 47:301, 2020                          | NR                 |
| <b>DVL3</b>   | Dishevelled Segment Polarity Protein 3        | No               | AD <sup>a</sup>        | 0.373            | 0.226 | 2.375            | Case control study (DVL gene sequencing)<br>one rare variant was identified in 176 NTD individuals (176 NTD individuals vs 480 controls).         | Liu J <i>Genet Genomics</i> 47:301, 2020                          | NR                 |

| Human gene            | Encoded protein                        | OMIM gene number | MOI OMIM or literature | PLI <sup>b</sup> | O/E   | Missense Z score | Genetic Study in human SB                                                                                                                                                                                                                             | Reference                                                                    | Mouse model has SB |
|-----------------------|----------------------------------------|------------------|------------------------|------------------|-------|------------------|-------------------------------------------------------------------------------------------------------------------------------------------------------------------------------------------------------------------------------------------------------|------------------------------------------------------------------------------|--------------------|
| <b>FREM2</b>          | FRAS1 Related Extracellular Matrix 2   | No               | AD <sup>a</sup>        | 0                | 0.366 | -0.655           | Case control study<br>Missense variant was identified in 1 out of 51 NTD families, this patient also carried <i>TCN2</i> likely deleterious variant (WES).                                                                                            | Lemay <i>Mol Genet Genomic Med</i> 7:e00467, 2019                            | NR                 |
| <b>FUZ</b>            | Fuzzy Planar Cell Polarity Protein     | Yes #182940      | AD                     | 0                | 0.483 | 0.678            | Case control study<br>Five rare coding variants were identified in 234 NTD patients. (Sanger sequencing).                                                                                                                                             | Seo <i>Hum Mol Genet</i> 20:4324, 2011                                       | NR                 |
| <b>FZD6</b>           | Frizzled Class Receptor 6              | No               | AD <sup>a</sup>        | 0                | 0.747 | 1.490            | Panel sequencing<br>One rare missense variant was identified in one out of 52 NTD patients.                                                                                                                                                           | Beaumont <i>Hum Genet</i> 138:363. 2019                                      | NR                 |
| <b>FOLR3</b>          | Folate Receptor Gamma                  | No               | AD <sup>a</sup>        | 0.02             | 0.48  | 0                | Case study<br>Two truncating variants were found in 348 MM individuals.                                                                                                                                                                               | Findley <i>Am J Med Genet A</i> 173:2973, 2017                               | NR                 |
| <b>GLDC</b>           | Glycine Decarboxylase                  | No               | AD <sup>a</sup>        | 0                | 0.836 | -0.581           | Case control study<br>Five different non-synonymous variants in <i>GLDC</i> in 258 NTD individuals.                                                                                                                                                   | Narisawa <i>Hum Mol Genet</i> 21:1496, 2012                                  | NR                 |
| <b>GLUT3 (SLC2A3)</b> | Solute Carrier Family 2 Member 3       | No               | AD <sup>a</sup>        | 0.064            | 0.289 | 1.238            | Case study<br>15 different non-synonymous variants in <i>GLUT3</i> in 96 MM individuals.                                                                                                                                                              | Connealy <i>Am J Obstet Gynecol</i> 211:305, 2014                            | NR                 |
| <b>GPC5</b>           | Glypican 5                             | No               | AD <sup>a</sup>        | 0                | 0.728 | -0.610           | CNV analysis<br>A <i>de novo</i> heterozygous deletion removed <i>GPC5</i> and part of <i>GPC6</i> was identified in 1/42 trios. They further confirmed that <i>GPC5</i> as a gene is required for normal neural tube development in zebrafish model. | Bassuk <i>Hum Mol Genet</i> 22:1097, 2013                                    | NR                 |
| <b>GRHL3</b>          | Grainyhead Like Transcription Factor 3 | No               | AD <sup>a</sup>        | 0.99             | 0.11  | 0.37             | Trio study and cases study<br>One <i>de novo</i> missense variant from 43 cases (WES).<br>Two truncating and 5 missense variants from 233 cases. (WES and MIPS).                                                                                      | Lemay <i>J Med Genet</i> 52:493, 2015<br>Lemay <i>Hum Mutat</i> 38:716, 2017 | Yes                |
| <b>LMNB1</b>          | Lamin B1                               | No               | AD <sup>a</sup>        | 0.567            | 0.209 | 1.670            | Case control study<br>Two rare variants were identified in 2 out of 239 NTD individuals (276 controls).                                                                                                                                               | Robinson <i>Birth Defects Res A Clin Mol Teratol</i> 97:398, 2013            | NR                 |
| <b>PRICKLE1</b>       | Prickle Planar Cell Polarity Protein 1 | No               | AD <sup>a</sup>        | 1                | 0.03  | 1.83             | Case control study<br>Rare missense heterozygous variants were identified. (810 cases, 346 controls) (Sanger sequencing),                                                                                                                             | Bosoi <i>Hum Mutat</i> 32:1371, 2011                                         | NR                 |
| <b>PTK7</b>           | Protein Tyrosine Kinase 7 (Inactive)   | No               | AD <sup>a</sup>        | 0.997            | 0.152 | 2.251            | Case control study<br>Three deleterious missense variants were identified in 192 spina bifida patients (190 controls) (Sanger sequencing).                                                                                                            | Lei <i>Mol Genet Genomic Med</i> 7:e00584, 2019                              | Yes                |
| <b>SCRIB</b>          | Scribble Planar Cell Polarity Protein  | No               | AD <sup>a</sup>        | 0.985            | 0.186 | 0.924            | Case control study<br>Five novel missense variants were identified in 192 spina bifida patients (190 controls).                                                                                                                                       | Lei <i>PLoS One</i> 8:e69262, 2013                                           | NR                 |
| <b>SLC19A1 (RFC1)</b> | Solute Carrier Family 19 Member 1      | No               | AD <sup>a</sup>        | 0                | 0.709 | 0.749            | Case study<br>Eight novel variants were identified in 348 spina bifida patients                                                                                                                                                                       | Findley <i>Am J Med Genet A</i> 173:2973, 2017                               | NR                 |

| Human gene           | Encoded protein                      | OMIM gene number | MOI OMIM or literature | PLI <sup>b</sup> | O/E   | Missense Z score | Genetic Study in human SB                                                                                                                                                                                                          | Reference                                       | Mouse model has SB |
|----------------------|--------------------------------------|------------------|------------------------|------------------|-------|------------------|------------------------------------------------------------------------------------------------------------------------------------------------------------------------------------------------------------------------------------|-------------------------------------------------|--------------------|
| <b>SHROOM2</b>       | Shroom Family Member 2               | No               | AD <sup>a</sup>        | 0.003            | 0.324 | -0.367           | Case control study<br>Rare variant enriched in 343 NTD patients, two missense variants. were confirmed by Sanger sequencing, and these variants were determined to have profound effects on gene function in vitro (206 controls). | Chen <i>Hum Genet</i> 137:195, 2018             | NR                 |
| <b>tnip1i3/TNIP1</b> | TNFAIP3 Interacting Protein 1        | No               | AD <sup>a</sup>        | 0.755            | 0.198 | 0.751            | Case study<br>Two different variants were identified in 7 MM cases, one is <i>de novo</i> .                                                                                                                                        | Francesca Childs <i>Nerv Syst</i> 32:1061, 2016 | NR                 |
| <b>VANGL1</b>        | VANGL Planar Cell Polarity Protein 1 | Yes #182940      | AD                     | 0.018            | 0.328 | 0.131            | Case control study<br>Three patients with heterozygous missense variants were found among 144 NTD patients (106 controls).                                                                                                         | Kibar <i>N Engl J Med</i> 356: 1432, 2007       | NR                 |
| <b>VANGL2</b>        | VANGL Planar Cell Polarity Protein 2 | Yes #182940      | AD                     | 0.818            | 0.173 | 1.466            | Case control study<br>7 novel missense variants were identified in 8 NTD patients in 673 NTD patients (222 controls) (Sanger sequencing).                                                                                          | Kibar <i>Clin Genet</i> 80:76, 2011             | Yes                |

**AD**, autosomal dominant; **AR**, autosomal recessive; **MOI**, mode of inheritance; **O/E**, observed/expected ratio; **OMIM**, Online Mendelian Inheritance in Men (<http://www.omim.org>);

**NTD**, Neural tube defect;

**NR**, not reported, **SB**, spina bifida.

<sup>a</sup>**AD**, only heterozygous variants were reported in literature.

<sup>b</sup>**PLI**, probability of LoF intolerance score.

**Table S4. 66 potential candidate genes known to cause human clinical syndromes with facultative SB features.**

Genes are listed by dominant and recessive mode of inheritance and alphabetically by gene symbol.

| Gene          | Encoded protein                                       | Reference                                                                    | MOI      | OMIM Gene number | SB phenotype                                  |
|---------------|-------------------------------------------------------|------------------------------------------------------------------------------|----------|------------------|-----------------------------------------------|
| <b>AMER1</b>  | APC Membrane Recruitment Protein 1                    | Winter <i>Clin Genet</i> 18:462, 1980                                        | XLD      | 300373           | SBO                                           |
| <b>BICD2</b>  | BICD Cargo Adaptor 2                                  | Picher-Martel <i>Neuromuscul Disord</i> 30:669, 2020                         | AD       | 618291           | SBO                                           |
| <b>BMP2</b>   | Bone Morphogenetic Protein 2                          | Tan <i>Am J Hum Genet</i> 101:985, 2017                                      | AD       | 617877           | SBO                                           |
| <b>CALM3</b>  | Calmodulin 3                                          | Wren <i>Circ Genom Precis Med</i> 12:375, 2019                               | AD       | 618782           | SB                                            |
| <b>CFC1</b>   | Cripto, FRL-1, Cryptic Family 1                       | Bamford <i>Nat Genet</i> 26:365, 2000                                        | AD       | 605376           | Myelocele                                     |
| <b>COG4</b>   | Component Of Oligomeric Golgi Complex 4               | Hersh <i>Am J Med Genet</i> 51:194, 1994                                     | AD       | 618150           | Tethered cord                                 |
| <b>CREBBP</b> | CREB Binding Protein                                  | Hadzsiev <i>Clin Dysmorphol</i> 28:137, 2019                                 | AD       | 180849           | SBO, lumbosacral lipomyelocele, Tethered cord |
| <b>DACT1</b>  | Dishevelled Binding Antagonist Of Beta Catenin 1      | Webb <i>Hum Mutat</i> 38:373, 2017                                           | AD       | 617466           | SBO                                           |
| <b>FAM58A</b> | Cyclin Q                                              | Lefroy <i>Clin Dysmorphol</i> 26:157, 2017                                   | XLD      | 300707           | SBO                                           |
| <b>FBN1</b>   | Fibrillin 1                                           | Pyritz <i>Am J Hum Genet</i> 43:726, 1988                                    | AD       | 154700           | Meningoceles                                  |
| <b>FLNB</b>   | Filamin B                                             | Larsen <i>J Pediatr</i> 37:574, 1950                                         | AD       | 150250           | SBO cervical SB                               |
| <b>HNF1B</b>  | HNF1 Homeobox B                                       | Hogendorf <i>Endokrynol Pol</i> 66:15, 2015                                  | AD       | Biobase          | SBO                                           |
| <b>HRAS</b>   | HRas Proto-Oncogene, GTPase                           | Gripp <i>Am J Med Genet A</i> 152A:1161, 2015                                | AD       | 218040           | Tethered spinal cord                          |
| <b>IRF6</b>   | Interferon Regulatory Factor 6                        | Froster-Iskenius <i>J Med Genet</i> 27:320, 1990                             | AD       | 119500           | SBO                                           |
| <b>JAG1</b>   | Jagged Canonical Notch Ligand 1                       | Turnpenny <i>Eur J Hum Genet</i> 20:251, 2012                                | AD       | Literature       | SBO                                           |
| <b>KCNH1</b>  | Potassium Voltage-Gated Channel Subfamily H Member 1  | Pai <i>Nat Commun</i> 9:998,2018                                             | AD       | 135500           | SBO                                           |
| <b>LMX1B</b>  | LIM Homeobox Transcription Factor 1 Beta              | Sweeney <i>J Med Genet</i> 40:153, 2003                                      | AD       | 161200           | SBO                                           |
| <b>MXN1</b>   | Motor Neuron And Pancreas Homeobox 1                  | Kim <i>J Hum Genet</i> 52:698, 2007                                          | AD       | 176450           | Tethered cord                                 |
| <b>MSX2</b>   | Msh Homeobox 2                                        | Terrafranca <i>Radiology</i> 61:60, 1953                                     | AD       | 168500           | SBO                                           |
| <b>MYH3</b>   | Myosin Heavy Chain 3                                  | Salati <i>APSP J Case Rep</i> 4:7,2013                                       | AD       | 193700           | SBO                                           |
| <b>NF1</b>    | Neurofibromin 1                                       | Tong <i>Genet Mol Res</i> 11: 2972, 2012                                     | AD       | 162200           | SB                                            |
| <b>NOTCH3</b> | Notch Receptor 3                                      | Gripp <i>Am J Med Genet A</i> 167a:271, 2015                                 | AD       | 130720           | Meningoceles                                  |
| <b>NSDHL</b>  | NAD(P) Dependent Steroid Dehydrogenase-Like           | Mathias <i>Am J Med Genet</i> 28:111, 1987                                   | AD       | Literature       | SB                                            |
| <b>PBX1</b>   | PBX Homeobox 1                                        | Tanno <i>J Med Genet</i> 54:7, 2017                                          | AD       | 617641           | SBO                                           |
| <b>PORCN</b>  | Porcupine O-Acyltransferase                           | Almeida <i>Am J Med Genet</i> 30:917, 1988                                   | XLD      | 305600           | Myelomeningocele SBO                          |
| <b>PTPN11</b> | Protein Tyrosine Phosphatase Non-Receptor Type 11     | Jacqueline A. Noonan <i>Encyclopedia of Endocrine Diseases</i> 371-374, 2004 | AD       | 151100           | SBO                                           |
| <b>SALL4</b>  | Spalt Like Transcription Factor 4                     | Varma <i>J Clin Diagn Res</i> 6:1435, 2012                                   | AD       | 607323           | SBO                                           |
| <b>SNRNPB</b> | Small Nuclear Ribonucleoprotein Polypeptides B And B1 | Hennekam <i>Clin Genet</i> 28:118, 1985                                      | AD       | 117650           | Myelomeningocele                              |
| <b>SRCAP</b>  | Snf2 Related CREBBP Activator Protein                 | Wiltshire <i>Am J Med Genet A</i> 136:81, 2005                               | AD       | 136140           | Tethered cord                                 |
| <b>STAG2</b>  | Stromal Antigen 2                                     | Paul Kruszka <i>Brain</i> 142:2631, 2019                                     | XLD, XLR | 301043           | SB                                            |
| <b>TRAF7</b>  | TNF Receptor Associated Factor 7                      | Tokita <i>Am J Hum Genet</i> 103:154, 2018                                   | AD       | 618164           | Tethered cord                                 |
| <b>BMPER</b>  | MP Binding Endothelial Regulator                      | Kuchinskaya <i>Orphanet J Rare Dis</i> 11:1, 2016                            | AR       | 608022           | Meningocele Tethered cord                     |
| <b>CCBE1</b>  | Collagen And Calcium Binding EGF Domains 1            | Hennekam <i>Am J Med Genet</i> 34:593, 1989                                  | AR       | 235510           | SBO                                           |
| <b>CHST3</b>  | Carbohydrate Sulfotransferase 3                       | Mégarbané <i>Am J Med Genet A</i> 130A:107, 2004                             | AR       | 143095           | SBO                                           |

| Gene            | Encoded protein                                       | Reference                                                  | MOI | OMIM Gene number | SB phenotype            |
|-----------------|-------------------------------------------------------|------------------------------------------------------------|-----|------------------|-------------------------|
| <b>COL11A2</b>  | Collagen Type XI Alpha 2 Chain                        | Ramer <i>Am J Med Genet</i> 45:614, 1993                   | AR  | 215150           | Meningocele             |
| <b>COL18A1</b>  | Collagen Type XVIII Alpha 1 Chain                     | Sertié <i>Hum Mol Genet</i> 9:2051, 2000                   | AR  | 267750           | SBO                     |
| <b>CUL7</b>     | Cullin 7                                              | Takatani <i>Hum Genome Var</i> 5:30, 2018                  | AR  | 273750           | SBO                     |
| <b>DLL3</b>     | Delta Like Canonical Notch Ligand 3                   | Giacoaia <i>J Med Genet</i> 28:51, 1991                    | AR  | 277300           | Diastematomyelia<br>SBO |
| <b>DMRT2</b>    | Doublesex And Mab-3 Related Transcription Factor 2    | Bouman <i>Am J Med Genet A</i> 176:1216, 2018              | AR  | 604935           | Tethered cord           |
| <b>DOCK3</b>    | Dedicator Of Cytokinesis 3                            | Wiltout <i>Eur J Hum Genet</i> 27:1225, 2019               | AR  | 618292           | SBA                     |
| <b>EFEMP2</b>   | EGF Containing Fibulin Extracellular Matrix Protein 2 | Hoyer <i>Clin Genet</i> 76: 276, 2009                      | AR  | 614437           | SB                      |
| <b>ETHE1</b>    | ETHE1 Persulfide Dioxygenase                          | Nowaczyk <i>Am J Med Genet</i> 75:292, 1998                | AR  | 602473           | Tethered cord           |
| <b>FIBP</b>     | FGF1 Intracellular Binding Protein                    | Akawi <i>Am J Med Genet A</i> 170:2111, 2016               | AR  | 617107           | SB                      |
| <b>FOXP1</b>    | Forkhead Box N1                                       | Amorosi <i>Clin Genet</i> 73:380, 2008                     | AR  | 601705           | SB                      |
| <b>HAAO</b>     | 3-Hydroxyanthranilate 3,4-Dioxygenase                 | Shi <i>N Engl J Med</i> 377: 544, 2017                     | AR  | 617660           | Tethered cord           |
| <b>HES7</b>     | Hes Family BHLH Transcription Factor 7                | Sparrow <i>Am J Med Genet A</i> 161:2244, 2013             | AR  | 613686           | Myelomeningocele<br>SBO |
| <b>HMX1</b>     | H6 Family Homeobox 1                                  | Schorderet <i>Am J Hum Genet</i> 82:1178, 2008             | AR  | 612109           | SBO                     |
| <b>MASP1</b>    | Mannan Binding Lectin Serine Peptidase 1              | Michels <i>J Pediatr</i> 93:444, 1978                      | AR  | 257920           | SBO                     |
| <b>NAA10</b>    | N-Alpha-Acetyltransferase 10, NatA Catalytic Subunit  | Shishido <i>Hum Genome Var</i> 7:23,2020                   | XL  | 309800           | SB<br>Myelomeningocele  |
| <b>NCAPG2</b>   | Non-SMC Condensin II Complex Subunit G2               | Khan <i>Am J Hum Genet</i> 104:94, 2019                    | AR  | 618460           | Tethered cord           |
| <b>PHGDH</b>    | Phosphoglycerate Dehydrogenase                        | Naveed <i>Am J Med Genet</i> 35:55, 1990                   | AR  | 256520           | SBA                     |
| <b>PISD</b>     | Phosphatidylserine Decarboxylase                      | Liberfarb <i>Ophthalmic Paediatr Genet</i> 7:151, 1986     | AR  | 618889           | SBO                     |
| <b>PLOD1</b>    | Procollagen-Lysine,2-Oxoglutarate 5-Dioxygenase 1     | Brady <i>Am J Med Genet C Semin Med Genet</i> 175:70, 2017 | AR  | 225400           | SBO<br>SB               |
| <b>POLA1</b>    | DNA Polymerase Alpha 1, Catalytic Subunit             | Esch <i>Am J Hum Genet</i> 104:957, 2019                   | XLR | 301030           | SBO                     |
| <b>PSAT1</b>    | Phosphoserine Aminotransferase 1                      | Naveed <i>Am J Med Genet</i> 35:55, 1990                   | AR  | Literature       | SB                      |
| <b>RBM8A</b>    | RNA Binding Motif Protein 8A                          | Gamba <i>Mol Syndromol</i> 7:344, 2016                     | AR  | 274000           | SB                      |
| <b>RNU4ATAC</b> | RNA, U4atac Small Nuclear (U12-Dependent Splicing)    | Pierce <i>Am J Med Genet A</i> 158A:606, 2012              | AR  | 210710           | Tethered cord           |
| <b>SC5D</b>     | Sterol-C5-Desaturase                                  | Rossi <i>Am J Med Genet A</i> 143A:2371, 2007              | AR  | 607330           | Meningocele             |
| <b>SMC1A</b>    | Structural Maintenance Of Chromosomes 1A              | Kruszka <i>Brain</i> 142:2631, 2019                        | XL  | 301044           | SB                      |
| <b>SOX3</b>     | SRY-Box Transcription Factor 3                        | Hureaux <i>Prenat Diagn</i> 39:1026, 2019                  | XL  | 300123           | Myelomeningocele<br>SBO |
| <b>TMEM216</b>  | Transmembrane Protein 216                             | Valente <i>Nat Genet</i> 42:619, 2010                      | AR  | 603194           | Meningocele             |
| <b>TMEM237</b>  | Transmembrane Protein 237                             | Janecke <i>J Pediatr</i> 144:264, 2004                     | AR  | 614424           | Meningocele             |
| <b>TNXB</b>     | Tenascin XB                                           | Schalkwijk <i>N Engl J Med</i> 345:1167, 2001              | AR  | 606408           | SBO                     |
| <b>TRIM36</b>   | Tripartite Motif Containing 36                        | Fuhrmann <i>Humangenetik</i> 13:241, 1971                  | AR  | 206500           | SB                      |
| <b>WFS1</b>     | Wolfamin ER Transmembrane Glycoprotein                | Duan <i>Front Endocrinol (Lausanne)</i> 9:18, 2018         | AR  | Biobase<br>HGMD  | SBO                     |
| <b>ZIC3</b>     | Zic Family Member 3                                   | Gebbia <i>Nat Genet</i> 17:305, 1997                       | AR  | Literature       | SB                      |

**AD**, autosomal dominant; **Biobase HGMD**, Human Gene Mutation Database (<https://portal.biobase-international.com/hgmd>); **AR**, autosomal recessive; **MOI**, mode of inheritance; **OMIM**, Online Mendelian Inheritance in Men (<http://www.omim.org>); **XL**, X-Linked; **SB**, spina bifida; **SBO**, spina bifida occulta; **SBA**, spina bifida aperta.

**Table S5. Decision making strategy to determine causality of identified variants.**

| <b>Recessive variant calling in known candidate genes</b>                            |                                                                                                                                                                                                                                                                                                                                                                                                                                                                                                                                                                                                                                                                                                                                                                                                                             |
|--------------------------------------------------------------------------------------|-----------------------------------------------------------------------------------------------------------------------------------------------------------------------------------------------------------------------------------------------------------------------------------------------------------------------------------------------------------------------------------------------------------------------------------------------------------------------------------------------------------------------------------------------------------------------------------------------------------------------------------------------------------------------------------------------------------------------------------------------------------------------------------------------------------------------------|
| <p>Include homozygous or compound heterozygous alleles as likely deleterious if:</p> | <p>Truncating mutation (stop, abrogation of start or stop, obligatory splice, frameshift) or<br/>                     Missense mutation if at minimum 3 of the 5 following criteria are met:</p> <ul style="list-style-type: none"> <li>- Continuously conserved at least among vertebrates (or beyond)</li> <li>- Previously reported as likely deleterious or functional evidence implicating causality</li> <li>- Loss of function in human allele is supported by functional data</li> <li>- Phenotype correlates with the published phenotype for the gene</li> <li>- Predicted to be deleterious for the protein function (at least in two among three prediction programs (Polyphen (&gt;0.5), SIFT (Del.), Mutation taster (D.C.))</li> <li>- Combined Annotation Dependent Depletion (CADD) score&gt;20</li> </ul> |
| <p>Exclude allele as likely deleterious if:</p>                                      | <p>Allele frequency (control database: EVS server, gnomAD, 1,000 genomes)</p> <ul style="list-style-type: none"> <li>- Heterozygous allele frequency &gt;1%</li> <li>- Homozygous allele frequency ≥3 in control databases</li> </ul> <p>Non segregation</p> <ul style="list-style-type: none"> <li>- Compound heterozygous variants are in cis or</li> <li>- an affected family member is without the biallelic variants including this one or</li> <li>- a unaffected family member has biallelic variants including this one</li> </ul> <p>Biallelic alleles identified in internal nephrotic syndrome control group<br/>                     Reverse phenotyping is negative</p>                                                                                                                                        |
| <b>Dominant variant calling in known candidate genes</b>                             |                                                                                                                                                                                                                                                                                                                                                                                                                                                                                                                                                                                                                                                                                                                                                                                                                             |
| <p>Include heterozygous alleles as likely deleterious if:</p>                        | <p>Truncating mutation (stop, abrogation of start or stop, obligatory splice, frameshift) or<br/>                     Missense mutation if at minimum 3 of the 5 following criteria are met:</p> <ul style="list-style-type: none"> <li>- Continuously conserved at least among vertebrates</li> <li>- Previously reported as likely deleterious</li> <li>- Loss of function in human allele is supported by functional data</li> <li>- Phenotype correlates with the published phenotype for the gene</li> <li>- Predicted to be deleterious for protein function (at least in two among three prediction programs (Polyphen (&gt;0.5), SIFT (Del.), Mutation taster (D.C.))</li> <li>- Combined Annotation Dependent Depletion (CADD) score&gt;20</li> </ul>                                                              |
| <p>Exclude allele as likely deleterious if:</p>                                      | <p>Allele frequency (control database: EVS server, gnomAD, 1000 genomes)</p> <ul style="list-style-type: none"> <li>- Heterozygous allele frequency ≥30 individuals in gnomAD databases</li> <li>- If the variant is present homozygously in any individual in control databases</li> </ul> <p>Non segregation</p> <ul style="list-style-type: none"> <li>- an affected family member is without the variant or</li> <li>- a unaffected family member has the variant</li> </ul> <p>Alleles identified in internal nephrotic syndrome control group<br/>                     Reverse phenotyping is negative</p>                                                                                                                                                                                                            |

**Table S6. Information on SB cases with variants identified in multiple of the candidate genes per family from lists A, B, or C (see Fig. 2) or unbiased exome-wide evaluation.**

| Family ID | Gene            | NM number      | Nucleotide change | Amino acid change | State | Evolutionary conservation <sup>a</sup> | PP2 SIFT MT    | CADD SCORE | EVS <sup>b</sup> | gnom AD <sup>c</sup> | HGMD <sup>d</sup> | Phenotypes                                                      | Segregation (M,P) |
|-----------|-----------------|----------------|-------------------|-------------------|-------|----------------------------------------|----------------|------------|------------------|----------------------|-------------------|-----------------------------------------------------------------|-------------------|
| B4146     | <b>CELSR3</b>   | NM_001407.2    | c.7858C>T         | p.Leu2620Phe      | het   | <i>C. elegans</i>                      | 0.47 Del. D.C. | 24.6       | 0/1/2,200        | 0/5/278,710          | Gene              | Myelomeningocele, neurogenic bladder, Chiari malformaion type 2 | M: NA<br>P: WT    |
|           | <b>PCK1</b>     | NM_002591.3    | c.179T>C          | p.Met60Thr        | Hom   | <i>C. intestinalis</i>                 | 0.95 Del. D.C. | 23.5       | 0/37/2,166       | 0/264/282,472        | Gene              |                                                                 | M: NA<br>P: het   |
| B2712     | <b>GRIP1</b>    | NM_001366722.1 | c.160G>A          | p.Val54Ile        | Hom   | <i>D. rerio</i>                        | 0.99 Tol. D.C. | 23.4       | 0/8/4,108        | 0/329/280,728        | ?DM               | Sacral spina bifida, neurogenic bladder, PUV                    | M: NA<br>P: NA    |
|           | <b>SEC14L3</b>  | NM_174975.4    | c:297G>A          | p.Trp99*          | Hom   | /                                      | /              | /          | 0/7/2,196        | 0/39/282,778         | No                |                                                                 | M: NA<br>P: NA    |
|           | <b>SEC14L3</b>  | NM_174975.4    | c.133C>T          | p.Arg45Trp        | Hom   | <i>C. elegans</i>                      | 0.56 Del. D.C. | 24.1       | 0/7/2,196        | 0/43/280,968         | No                |                                                                 | M: NA<br>P: NA    |
|           | <b>C12orf70</b> | NM_001145010.1 | c.658-1G>T        | 100% ESS          | Hom   | /                                      | /              | /          | NP               | NP                   | No                |                                                                 | M: NA<br>P: NA    |
|           | <b>SLC1A7</b>   | NM_001287595.1 | c.40T>C           | p.Cys14Arg        | Hom   | <i>D. rerio</i>                        | 0.95 Del. /    | 26.4       | NP               | NP                   | No                |                                                                 | M: NA<br>P: NA    |
|           | <b>BCORL1</b>   | NM_001379451.1 | c.2467C>T         | p.Pro823Ser       | Hom   | <i>D. rerio</i>                        | / Del. D.C.    | 21.8       | NP               | 0/1/182,258          | Gene              |                                                                 | M: NA<br>P: NA    |
|           | <b>UPF3B</b>    | NM_080632.2    | c.385G>A          | p.Ala129Thr       | Hom   | <i>D. melanogaster</i>                 | 0.998 Del. D.C | 28.3       | NP               | NP                   | Gene              |                                                                 | M: NA<br>P: NA    |
| B3630     | <b>MYO5C</b>    | NM_018728.3    | c.1928C>T         | p.Thr643Met       | Hom   | <i>D. rerio</i>                        | 0.55 Del. D.C  | 23.6       | 0/10/4,171       | 0/304/280,918        | Gene              | Tethered cord, neurogenic bladder, R renal agenesis             | M: NA<br>P: NA    |
|           | <b>CHST13</b>   | NM_152889.2    | c.150C>G          | p.Ser50Arg        | Hom   | <i>D. rerio</i>                        | 0.98 Del. P    | 15.25      | 0/3/2,200        | 0/277/282,706        | No                |                                                                 | M: NA<br>P: NA    |
| B3503     | <b>RHD</b>      | NM_001282871.1 | c.671A>G          | p.Asn224Ser       | Hom   | <i>D. melanogaster</i>                 | 0.98 Del. D.C  | 22.5       | NP               | 0/1/225,114          | Gene              | Split cord malformation type 1, BL Hydronephrosis               | M: het<br>P: NA   |
|           | <b>KIFC1</b>    | NM_002263.3    | c.889C>T          | p.Arg297Cys       | het   | <i>X. tropicalis</i>                   | 1.00 Del. D.C  | 30         | NP               | 0/2/251,402          | No                |                                                                 | M: het<br>P: NA   |
|           |                 |                | c.892C>T          | p.Arg298Trp       | het   | <i>X. tropicalis</i>                   | 1.00 Del. D.C  | 28.3       | NP               | 0/5/251,412          | No                |                                                                 | M: WT<br>P: NA    |



| Family ID | Gene  | NM number      | Nucleotide change | Amino acid change | State | Evolutionary conservation <sup>a</sup> | PP2 SIFT MT   | CADD SCORE | EVS <sup>b</sup> | gnomAD <sup>c</sup> | HGMD <sup>d</sup> | Phenotypes                                                                           | Segregation (M,P) |
|-----------|-------|----------------|-------------------|-------------------|-------|----------------------------------------|---------------|------------|------------------|---------------------|-------------------|--------------------------------------------------------------------------------------|-------------------|
| B3743     | TGFB2 | NM_001135599.3 | c.236A>T          | p.Gln79Leu        | Het   | <i>D. rerio</i>                        | 0.01 Del. D.C | 23.3       | NP               | NP                  | DM                | Myelomeningocele, skeletal deformity, neurogenic bladder, Chiari malformation type 2 | M: NA<br>P: NA    |
|           | CD36  | NM_001001548.2 | c.1079T>G         | p.Leu360*         | Hom   | /                                      | /             | 42         | 0/5/4,291        | 0/65/282,068        | DM                |                                                                                      |                   |
|           | PHKA2 | NM_000292.2    | c.1031A>C         | p.Asp344Ala       | Hom   | <i>X. tropicalis</i>                   | 0.05 Del. D.C | 22.4       | NP               | NP                  | Gene              |                                                                                      |                   |
|           | PHF16 | NM_001077445.2 | c.1931C>G         | p.Ala644Gly       | Hom   | <i>D. rerio</i>                        | 0.73 / D.C    | 26.4       | NP               | NP                  | No                |                                                                                      |                   |

**BL**, bilateral; **CADD**, Combined Annotation Dependent Depletion; **D.C.**, disease causing; **Del.**, deleterious; **del**, deletion; **ESS**, essential splice site; **EVS**, Exome Variant Server; **fs**, frameshift; **gnomAD**, Genome Aggregation Database; **het**, heterozygous; **Hom**, homozygous; **Hemi**, hemizygous; **L**, left; **MT**, Mutation Taster; **NA**, not available; **NP**, not present; **PP2**, PolyPhen 2; **PUV**, posterior urethral valve; **R**, right; **SIFT**, Sorting intolerant from tolerant, **Tol**, tolerate; **WT**, wildtype.

<sup>a</sup>Evolutionary conservation was assessed across phylogeny over 8 species: *M. muscularis*, *Mus musculus*; *G. gallus*, *Gallus gallus*; *X. tropicalis*, *Xenopus tropicalis*; *D. rerio*, *Danio rerio*; *C. elegans*, *Caenorhabditis elegans*; *C. intestinalis*, *Ciona intestinalis*; *D. melanogaster*, *Drosophila melanogaster*; *S. cerevisiae*, *Saccharomyces cerevisiae*.

<sup>b,c</sup>Variation frequencies listed for homozygous/ hemizygous (if applicable)/ heterozygous/ total alleles detected in the population.

<sup>d</sup>HGMD, (<https://portal.biobaseinternational.com/hgmd>). If the exact variant has previously been reported and classified as a pathogenic mutation to be disease causing, variant denoted as "**DM**". Variant denoted as "**?DM**" if the variant is a likely pathogenic mutation to be disease causing but where the author indicated some degree of doubt or subsequent evidence calls the deleterious nature of the variant into question. If the gene but not the exact variant has been reported for the corresponding phenotype "**Gene**" is indicated. If the gene has not been reported in HGMD, "No" is indicated.

**Table S7. Variants that were excluded after reverse phenotyping, segregation analysis, or were present in in-house negative control analysis.**

| Family ID | Gene          | NM number      | Nucleotide change | Amino acid change | State | Evolutionary conservation <sup>a</sup> | PP2 SIFT MT    | CADD SCORE | EVS <sup>b</sup> | gnom AD <sup>c</sup> | HGMD <sup>d</sup> | Segregation (M,P) | Reason to exclude                                                                           |
|-----------|---------------|----------------|-------------------|-------------------|-------|----------------------------------------|----------------|------------|------------------|----------------------|-------------------|-------------------|---------------------------------------------------------------------------------------------|
| B4102     | <b>SALL4</b>  | NM_020436.4    | c.1915G>A         | p.Val639Met       | het   | <i>D. rerio</i>                        | 0.99 Del. D.C  | 25.6       | /                | /                    | Gene              | M: NA<br>P: NA    | Negative reverse phenotyping                                                                |
| B4195     | <b>MYH3</b>   | NM_002470.3    | c.3838C>T         | p.Arg1280Cys      | het   | <i>C. intestinalis</i>                 | 0.96 Del. D.C  | 27.7       | /                | 0/8/251,454          | Gene              | M: NA<br>P: NA    | Negative reverse phenotyping                                                                |
| B4103     | <b>CELSR1</b> | NM_001378328.1 | c.2296G>A         | p.Asp766Asn       | het   | <i>D. melanogaster</i>                 | 1.00 Del. /    | 23.5       | /                | /                    | Gene              | M: WT<br>P: NA    | Equal variant burden in control cohort ( <b>Table S8</b> )                                  |
|           | <b>CELSR3</b> | NM_001407.2    | c.2995A>G         | p.Thr999Ala       | het   | <i>D. rerio</i>                        | 0.99 Del. D.C  | 23.8       | /                | /                    | Gene              | M: het<br>P: NA   | Inherited from healthy mother                                                               |
| B4109     | <b>GCLC</b>   | NM_001498.3    | c.49C>T           | p.Arg17Cys        | het   | <i>D. rerio</i>                        | 0.956 Del. D.C | 31         | /                | /                    | Gene              | M: WT<br>P: WT    | Equal variant burden in control cohort ( <b>Table S8</b> )                                  |
| B4145     | <b>CELSR2</b> | NM_001408.2    | c.2030T>G         | p.Leu677Arg       | het   | <i>D. rerio</i>                        | 0.94 Del. D.C  | 24.1       | /                | 0/3/251,390          | Gene              | M: NA<br>P: NA    | Equal variant burden in control cohort ( <b>Table S8</b> )                                  |
| B4210     | <b>CELSR1</b> | NM_001378328.1 | c.6010G>A         | p.Asp2004Asn      | het   | <i>D. rerio</i>                        | 0.99 Del. D.C  | 24.1       | 0/3/2199         | 0/20/279,448         | Gene              | M: het<br>P: NA   | Inherited from healthy mother<br>Equal variant burden in control cohort ( <b>Table S8</b> ) |
| B4226     | <b>PTCH1</b>  | NM_000264.3    | c.388G>A          | p.Val130Met       | het   | <i>C. elegans</i>                      | 0.99 Del. D.C  | 29.6       | /                | 0/2/248,730          | Gene              | M: WT<br>P: Het   | Inherited from healthy father<br>Equal variant burden in control cohort ( <b>Table S8</b> ) |
| B4271     | <b>GPR161</b> | NM_001267609.1 | c.1562delG        | p.Gly521Alafs*9   | het   | /                                      | /              | /          | /                | 0/12/282,026         | Gene              | M: het<br>P: WT   | Inherited from healthy mother<br>Equal variant burden in control cohort ( <b>Table S8</b> ) |
| B4304     | <b>PLEC</b>   | NM_201380.2    | c.8506G>A         | p.Ala2836Thr      | het   | <i>X. tropicalis</i>                   | 0.97 Del. D.C  | 24.1       | /                | 0/12/276,946         | Gene              | M: WT<br>P: NA    | Equal variant burden in control cohort ( <b>Table S8</b> )                                  |
|           |               |                | c.4762G>A         | p.Glu1588Lys      | het   | <i>X. tropicalis</i>                   | 0.99 Tol. D.C  | 27.3       | /                | 1/120/217,216        | Gene              | M: het<br>P: NA   | Equal variant burden in control cohort ( <b>Table S8</b> )                                  |
| B4305     | <b>CELSR3</b> | NM_001407.2    | c.2401C>T         | p.Asp1833Val      | het   | <i>D. rerio</i>                        | 1.00 Del. D.C  | 32         | 0/1/4299         | 0/4/251,424          | Gene              | M: het<br>P: NA   | Inherited from healthy mother                                                               |

|              | <b>CELSR2</b> | NM_001408.2    | c.5498A>T         | p.Arg 801Cys      | het   | <i>X. tropicalis</i>                   | 0.01 Del. D.C | 22.3       | 0/2/4 298        | 0/9/ 282,778        | Gene              | M: WT<br>P: NA    | Equal variant burden in control cohort ( <b>Table S8</b> ) |
|--------------|---------------|----------------|-------------------|-------------------|-------|----------------------------------------|---------------|------------|------------------|---------------------|-------------------|-------------------|------------------------------------------------------------|
| Family ID    | Gene          | NM number      | Nucleotide change | Amino acid change | State | Evolutionary conservation <sup>a</sup> | PP2 SIFT MT   | CADD SCORE | EVS <sup>b</sup> | gnomAD <sup>c</sup> | HGMD <sup>d</sup> | Segregation (M,P) | Evidence to Exclude                                        |
| <b>B750</b>  | <b>CELSR2</b> | NM_001408.2    | c.8629G>A         | p.Gly 2877Ser     | het   | <i>D. rerio</i>                        | 0.93 Del. D.C | 23.6       | /                | 0/21/21 2,800       | Gene              | M: NA<br>P: NA    | Equal variant burden in control cohort ( <b>Table S8</b> ) |
| <b>B2712</b> | <b>CELSR1</b> | NM_001378328.1 | c.8015T>G         | p.Leu 2672Arg     | het   | <i>D. rerio</i>                        | 1.00 Del. D.C | 29.4       | /                | /                   | Gene              | M: NA<br>P: NA    | Equal variant burden in control cohort ( <b>Table S8</b> ) |
| <b>B3107</b> | <b>JAG1</b>   | NM_000214.2    | c.3644A>C         | p.Glu 1215Ala     | het   | <i>D. rerio</i>                        | 0.2 Tol. D.C  | 24.7       | /                | /                   | Gene              | M: NA<br>P: NA    | Equal variant burden in control cohort ( <b>Table S8</b> ) |

**CADD**, Combined Annotation Dependent Depletion; **D.C.**, Disease Causing; **Del.**, Deleterious; **del**; deletion, **EVS**, Exome Variant Server; **gnomAD**, Genome Aggregation Database; **het**, heterozygous; **MT**, Mutation Taster; **PP2**, PolyPhen 2; **SIFT**, Sorting intolerant from tolerant, **Tol**, tolerate.

<sup>a</sup>Evolutionary conservation was assessed across phylogeny: *X. tropicalis*, *Xenopus tropicalis*; *D. rerio*, *Danio rerio*; *C. elegans*, *Caenorhabditis elegans*; *C. intestinalis*, *Ciona intestinalis*; *D. melanogaster*, *Drosophila melanogaster*;

<sup>b,c</sup>Variant frequencies listed for homozygous/ hemizygous (if applicable)/ heterozygous/ total alleles detected in the population.

<sup>d</sup>HGMD, (<https://portal.biobaseinternational.com/hgmd>). If the exact variant has previously been reported and classified as a pathogenic mutation to be disease causing, variant denoted as "**DM**". Variant denoted as "**?DM**" if the variant is a likely pathogenic mutation to be disease causing but where the author indicated some degree of doubt or subsequent evidence calls the deleterious nature of the variant into question. If the gene but not the exact variant has been reported for the corresponding phenotype "**Gene**" is indicated.

**Table S8. Variant information for SB cohort and internal control cohort.**

An in-house negative control cohort of 50 families with steroid-resistant nephrotic syndrome (SRNS), in whom a definitive underlying monogenic cause for SRNS had already been established, was queried for variants in the genes in which we detected likely deleterious variants in our SB cohort (see **Table 1-2, Table S7-S8**). Per each gene, the number of families, in whom a likely deleterious variant was detected is shown for the study cohort and the control cohort, and the final decision regarding presumed deleteriousness is listed. The listed variants were unique per family.

Genes were color-coded based on gene types (see **Fig. 1**): A) Mouse SB candidate genes (Orange) – B) candidate genes known to potentially cause human isolated SB (Pink) – C) candidate genes known to cause human syndromes with facultative SB features (Green)– genes were identified from an unbiased exome-wide evaluation (Red).

| Gene            | SB cohort (50 families)<br>Number of families [MOI] | In-house control cohort<br>(50 families with SRNS)<br>Number of families [MOI] | Final decision       |
|-----------------|-----------------------------------------------------|--------------------------------------------------------------------------------|----------------------|
| <i>CELSR1</i>   | 3 [het]                                             | 1 [hom]<br>1 [comp het]<br>2 [het]                                             | Unlikely deleterious |
| <i>CELSR2</i>   | 2 [het]                                             | 2 [het]                                                                        | Unlikely deleterious |
| <i>JAG1</i>     | 1 [het]                                             | 1[hom]<br>1 [het]                                                              | Unlikely deleterious |
| <i>GPR161</i>   | 1 [het]                                             | 1 [het]                                                                        | Unlikely deleterious |
| <i>PLEC</i>     | 1 [comp het]                                        | 1 [comp het]                                                                   | Unlikely deleterious |
| <i>GCLC</i>     | 1 [het]                                             | 1 [het]                                                                        | Unlikely deleterious |
| <i>CELSR3</i>   | 3 [het]                                             | None                                                                           | Possibly deleterious |
| <i>PRICKLE1</i> | 1 [het]                                             | None                                                                           | Possibly deleterious |
| <i>TGFB2</i>    | 1 [het]                                             | None                                                                           | Possibly deleterious |
| <i>FOXC2</i>    | 1 [het]                                             | None                                                                           | Possibly deleterious |
| <i>AXIN1</i>    | 1 [het]                                             | None                                                                           | Possibly deleterious |
| <i>TULP3</i>    | 1 [het]                                             | None                                                                           | Possibly deleterious |
| <i>IGBP1</i>    | 1 [het]                                             | None                                                                           | Possibly deleterious |
| <i>ZNF790</i>   | 1 [comp het]                                        | None                                                                           | Possibly deleterious |
| <i>MAML1</i>    | 1 [comp het]                                        | None                                                                           | Possibly deleterious |
| <i>NUP205</i>   | 1 [comp het]                                        | None                                                                           | Possibly deleterious |
| <i>EWSR1</i>    | 1 [hom]                                             | None                                                                           | Possibly deleterious |
| <i>AMBRA1</i>   | 1 [hom]                                             | None                                                                           | Possibly deleterious |
| <i>CD36</i>     | 1 [hom]                                             | None                                                                           | Possibly deleterious |
| <i>PHKA2</i>    | 1 [hemi]                                            | None                                                                           | Possibly deleterious |
| <i>PHF16</i>    | 1 [hemi]                                            | None                                                                           | Possibly deleterious |
| <i>RHD</i>      | 1 [hemi]                                            | None                                                                           | Possibly deleterious |
| <i>MYO5C</i>    | 1 [hom]                                             | None                                                                           | Possibly deleterious |
| <i>TSPEAR</i>   | 1 [hom]                                             | None                                                                           | Possibly deleterious |
| <i>KIFC1</i>    | 1 [comp het]                                        | None                                                                           | Possibly deleterious |
| <i>MTMR8</i>    | 1 [hemi]                                            | None                                                                           | Possibly deleterious |
| <i>PIK3R4</i>   | 1 [hom]                                             | None                                                                           | Possibly deleterious |
| <i>PCK1</i>     | 1 [hom]                                             | None                                                                           | Possibly deleterious |
| <i>TTC21A</i>   | 1 [comp het]                                        | None                                                                           | Possibly deleterious |
| <i>GRIP1</i>    | 1 [hom]                                             | None                                                                           | Possibly deleterious |
| <i>GPR83</i>    | 1 [het]                                             | None                                                                           | Possibly deleterious |
| <i>ATG2B</i>    | 1 [comp het]                                        | None                                                                           | Possibly deleterious |
| <i>MAGI3</i>    | 1 [comp het]                                        | None                                                                           | Possibly deleterious |
| <i>CHST13</i>   | 1 [hom]                                             | None                                                                           | Possibly deleterious |

MOI, mode of inheritance.
